# Supplementary material for: Attitudes of dentists and interns in Riyadh to the use of dental amalgam
Source: PubMed Central journal article supplement (PMC5114813; doi:10.1186/s13104-016-2294-x), 2016-11-17
Supplement: 13104_2016_2294_MOESM2_ESM.pdf [file 13104_2016_2294_MOESM2_ESM.pdf]

| Sn | Sample | D_1 | D_2 | D_3 | Q_1 | Q_2a | Q_2b | Q_2c |   |
|----|--------|-----|-----|-----|-----|------|------|------|---|
| 40 | 2      | 2   | 2   | 1   | 1   | 2    | 2    | 2    | 2 |
| 41 | 2      | 2   | 2   | 1   | 1   | 2    | 2    | 1    | 1 |
| 42 | 2      | 2   | 2   | 1   | 4   | 2    | 2    | 1    | 2 |
| 43 | 2      | 1   | 1   | 1   | 3   | 2    | 2    | 2    | 1 |
| 44 | 2      | 2   | 2   | 1   | 1   | 2    | 2    | 1    | 2 |
| 45 | 2      | 2   | 2   | 1   | 2   | 1    | 1    | 1    | 1 |
| 46 | 2      | 1   | 1   | 2   | 2   |      | 2    | 1    | 2 |
| 47 | 2      | 1   | 1   | 2   | 2   | 2    | 2    | 1    | 2 |
| 48 | 2      | 1   | 1   | 2   | 3   | 2    | 2    | 2    | 2 |
| 49 | 2      | 1   | 1   | 2   | 3   | 2    | 2    | 2    | 1 |
| 50 | 2      | 1   | 1   | 1   | 3   | 1    | 1    | 1    | 1 |
| 51 | 2      | 1   | 1   | 2   | 2   | 2    | 2    | 1    | 1 |
| 52 | 2      | 2   | 2   | 2   | 2   | 1    | 1    | 1    | 1 |
| 53 | 2      | 2   | 2   | 2   | 2   | 2    | 2    | 2    | 2 |
| 54 | 2      | 1   | 1   | 2   | 2   | 1    | 2    | 1    | 2 |
| 55 | 2      | 1   | 1   | 2   | 2   | 2    | 1    | 2    | 2 |
| 56 | 2      | 1   | 1   | 2   | 2   | 2    | 2    | 2    | 2 |
| 57 | 2      | 1   | 1   | 2   | 2   | 2    | 2    | 2    | 2 |
| 58 | 2      | 1   | 1   | 2   | 1   | 2    | 2    | 2    | 2 |
| 59 | 2      | 1   | 1   | 2   | 1   | 2    | 2    | 2    | 2 |
| 60 | 2      | 1   | 1   | 2   | 1   | 2    | 2    | 2    | 2 |
| 61 | 2      | 1   | 1   | 1   | 4   |      | 1    | 2    | 2 |
| 62 | 2      | 1   | 1   | 1   | 4   |      | 1    | 2    | 2 |
| 63 | 2      | 1   | 1   | 1   | 4   | 2    | 2    | 2    | 2 |
| 64 | 2      | 1   | 1   | 1   | 4   | 2    | 2    | 2    | 2 |
| 65 | 2      | 1   | 1   | 2   | 2   | 2    | 2    | 2    | 2 |
| 66 | 2      | 1   | 1   | 2   | 2   | 2    | 2    | 2    | 2 |
| 67 | 2      | 1   | 1   | 1   | 4   | 2    | 2    | 1    | 2 |
| 68 | 2      | 1   | 1   | 1   | 4   | 2    | 2    | 1    | 2 |
| 69 | 2      | 1   | 1   | 2   | 4   | 2    | 2    | 2    | 2 |
| 70 | 2      | 1   | 1   | 2   | 4   | 2    | 2    | 2    | 2 |
| 71 | 2      | 1   | 1   | 1   | 3   | 2    | 2    | 1    | 1 |
| 72 | 2      | 1   | 1   | 1   | 3   | 2    | 2    | 1    | 1 |
| 73 | 2      | 1   | 1   | 1   | 4   | 2    | 2    | 2    | 2 |
| 74 | 2      | 1   | 1   | 1   | 4   | 2    | 2    | 2    | 2 |
| 75 | 2      | 2   | 2   | 1   | 1   | 2    | 2    | 1    | 2 |
| 76 | 2      | 2   | 2   | 1   | 1   | 2    | 2    | 1    | 1 |
| 77 | 2      | 2   | 2   | 1   | 1   | 1    | 2    | 1    | 1 |
| 78 | 2      | 2   | 2   | 2   | 2   | 2    | 2    | 2    | 2 |
| 79 | 2      | 1   | 1   | 2   | 2   | 2    | 1    | 2    | 2 |
| 80 | 2      | 1   | 1   | 2   | 3   | 2    | 2    | 2    | 2 |
| 81 | 2      | 1   | 1   | 1   | 4   | 1    | 2    | 2    | 1 |
| 82 | 2      | 1   | 1   | 1   | 4   | 1    | 2    | 2    | 1 |
| 83 | 2      | 1   | 1   | 1   | 4   | 2    | 2    | 1    | 1 |
| 84 | 2      | 1   | 1   | 1   | 4   | 2    | 2    | 1    | 1 |
| 85 | 2      | 1   | 1   | 2   | 2   | 1    | 1    | 1    | 2 |

|     |   |   |   |   |   |   |   |   |
|-----|---|---|---|---|---|---|---|---|
| 86  | 2 | 2 | 1 | 1 | 1 | 2 | 1 | 1 |
| 87  | 2 | 2 | 1 | 1 | 2 | 2 | 1 | 2 |
| 88  | 2 | 1 | 1 | 4 | 2 | 2 | 2 | 2 |
| 89  | 2 | 1 | 1 | 4 | 2 | 2 | 2 | 1 |
| 90  | 2 | 1 | 1 | 4 | 2 | 2 | 2 | 1 |
| 91  | 2 | 1 | 1 | 4 | 1 | 2 | 1 | 1 |
| 92  | 2 | 2 | 1 | 1 | 2 | 2 | 1 | 1 |
| 93  | 2 | 2 | 1 | 1 | 2 | 2 | 1 | 1 |
| 94  | 2 | 2 | 1 | 1 | 1 | 2 | 1 | 2 |
| 95  | 2 | 2 | 1 | 1 | 2 | 2 | 1 | 2 |
| 96  | 2 | 2 | 1 | 1 | 2 | 2 | 1 | 2 |
| 97  | 2 | 1 | 1 | 1 | 2 | 2 | 1 | 1 |
| 98  | 2 | 2 | 2 | 2 | 1 | 1 | 1 | 2 |
| 99  | 2 | 1 | 2 | 3 | 1 | 1 | 2 | 2 |
| 100 | 2 | 1 | 1 | 2 | 1 | 2 | 1 | 1 |
| 101 | 2 | 1 | 2 | 3 | 2 | 2 | 2 | 2 |
| 102 | 2 | 2 | 1 | 1 | 1 | 2 | 1 | 2 |
| 103 | 2 | 2 | 1 | 1 | 1 | 2 | 1 | 2 |
| 104 | 2 | 1 | 2 | 3 | 1 | 2 | 1 | 2 |
| 105 | 2 | 2 | 2 | 3 | 1 | 2 | 1 | 1 |
| 106 | 2 | 1 | 1 | 2 | 2 | 2 | 2 | 2 |
| 107 | 2 | 2 | 1 | 1 | 2 | 2 | 1 | 2 |
| 108 | 2 | 1 | 2 | 3 | 2 | 1 | 1 | 1 |
| 109 | 2 | 1 | 2 | 2 | 2 | 2 | 1 | 2 |
| 110 | 2 | 2 | 2 | 3 | 1 | 2 | 1 | 1 |
| 111 | 2 | 1 | 2 | 2 | 2 | 2 | 2 | 2 |
| 112 | 2 | 1 | 1 | 2 | 2 | 2 | 2 | 2 |
| 113 | 2 | 1 | 2 | 2 | 2 | 2 | 1 | 2 |
| 114 | 2 | 2 | 2 | 2 | 2 | 2 | 2 | 2 |
| 115 | 2 | 1 | 1 | 3 | 2 | 2 | 2 | 2 |
| 116 | 2 | 2 | 1 | 3 | 2 | 2 | 2 | 1 |
| 117 | 2 | 1 | 2 | 2 | 2 | 2 | 2 | 2 |
| 118 | 2 | 1 | 1 | 2 | 1 | 1 | 1 | 2 |
| 119 | 2 | 2 | 1 | 1 | 2 | 2 | 1 | 1 |
| 120 | 2 | 2 | 1 | 1 | 2 | 2 | 1 | 1 |
| 121 | 2 | 2 | 1 | 1 | 2 | 2 | 1 | 2 |
| 122 | 2 | 2 | 1 | 4 | 2 | 2 | 1 | 2 |
| 123 | 2 | 2 | 1 | 4 | 2 | 2 | 1 | 2 |
| 124 | 2 | 2 | 1 | 1 | 2 | 2 | 1 | 2 |
| 125 | 2 | 1 | 2 | 2 | 2 | 2 | 2 | 2 |
| 126 | 2 | 2 | 2 | 2 | 2 | 2 | 1 | 1 |
| 127 | 2 | 1 | 1 | 1 | 2 | 2 | 1 | 1 |
| 128 | 2 | 1 | 1 | 1 | 2 | 1 | 2 | 2 |
| 129 | 2 | 1 | 1 | 1 | 2 | 2 | 2 | 2 |
| 130 | 2 | 1 | 1 | 1 | 2 | 2 | 2 | 2 |
| 131 | 2 | 1 | 2 | 1 | 2 | 2 | 1 | 1 |
| 132 | 2 | 1 | 1 | 4 | 1 | 2 | 1 | 1 |

|     |   |   |   |   |   |   |   |   |
|-----|---|---|---|---|---|---|---|---|
| 133 | 2 | 2 | 1 | 1 | 2 | 1 | 2 | 2 |
| 134 | 2 | 2 | 1 | 2 | 1 | 1 | 1 | 1 |
| 135 | 2 | 1 | 1 | 1 | 1 | 2 | 1 | 1 |
| 136 | 2 | 2 | 1 | 1 | 2 | 2 | 1 | 1 |
| 137 | 2 | 1 | 1 | 3 | 2 | 2 | 2 | 1 |
| 138 | 2 | 1 | 1 | 4 | 1 | 1 | 2 | 2 |
| 139 | 2 | 1 | 1 | 1 | 2 | 2 | 2 | 2 |
| 140 | 2 | 1 | 1 | 4 | 2 | 2 | 2 | 2 |
| 141 | 2 | 1 | 1 | 4 | 2 | 2 | 2 | 2 |
| 142 | 2 | 1 | 1 | 3 | 1 | 1 | 1 | 2 |
| 143 | 2 | 1 | 1 | 1 | 2 | 2 | 1 | 2 |
| 144 | 2 | 1 | 1 | 2 | 2 | 2 | 2 | 2 |
| 145 | 2 | 2 | 2 | 3 | 2 | 2 | 2 | 2 |
| 147 | 2 | 1 | 2 | 2 | 1 | 2 | 1 | 2 |
| 148 | 2 | 1 | 1 | 1 | 1 | 2 | 1 | 1 |
| 149 | 2 | 1 | 1 | 1 | 2 | 2 | 2 | 2 |
| 150 | 2 | 1 | 1 | 3 | 2 | 2 | 2 | 2 |
| 151 | 2 | 1 | 1 | 2 | 2 | 2 | 2 | 2 |
| 152 | 2 | 2 | 2 | 2 | 2 | 2 | 2 | 2 |
| 153 | 2 | 1 | 2 | 2 | 1 | 2 | 1 | 2 |
| 154 | 2 | 1 | 2 | 2 | 2 | 2 | 2 | 2 |
| 155 | 2 | 2 | 2 | 2 | 2 | 2 | 2 | 2 |
| 156 | 2 | 2 | 2 | 2 | 2 | 2 | 2 | 2 |
| 157 | 2 | 1 | 2 | 3 | 1 | 1 | 1 | 2 |
| 158 | 2 | 2 | 2 | 2 | 2 | 2 | 1 | 2 |
| 159 | 2 | 1 | 2 | 4 | 1 | 2 | 1 | 2 |
| 160 | 2 | 1 | 2 | 2 | 2 | 2 | 2 | 2 |
| 161 | 2 | 1 | 2 | 2 | 2 | 2 | 2 | 2 |
| 162 | 2 | 1 | 2 | 3 | 2 | 2 | 1 | 2 |
| 163 | 2 | 1 | 2 | 2 | 1 | 2 | 1 | 2 |
| 164 | 2 | 1 | 2 | 2 | 1 | 2 | 1 | 2 |
| 165 | 2 | 1 | 2 | 2 | 1 | 2 | 1 | 2 |
| 166 | 2 | 1 | 1 | 1 | 2 | 2 | 2 | 2 |
| 167 | 2 | 1 | 1 | 1 | 2 | 2 | 1 | 2 |
| 168 | 2 | 1 | 1 | 1 | 2 | 2 | 1 | 2 |
| 169 | 2 | 1 | 1 | 1 | 2 | 2 | 2 | 2 |
| 170 | 2 | 2 | 1 | 1 | 2 | 2 | 1 | 2 |
| 171 | 2 | 1 | 1 | 1 | 2 | 2 | 1 | 1 |
| 172 | 2 | 1 | 1 | 2 | 2 | 2 | 2 | 2 |
| 173 | 2 | 2 | 1 | 1 | 2 | 1 | 2 | 2 |
| 174 | 2 | 1 | 1 | 1 | 2 | 2 | 1 | 2 |
| 175 | 2 | 1 | 1 | 1 | 1 | 2 | 1 | 2 |
| 176 | 2 | 1 | 1 | 1 | 1 | 2 | 1 | 2 |
| 177 | 2 | 1 | 1 | 1 | 2 | 2 | 1 | 2 |
| 178 | 2 | 1 | 1 | 1 | 2 | 2 | 1 | 2 |
| 179 | 2 | 1 | 1 | 1 | 1 | 1 | 2 | 2 |
| 180 | 2 | 1 | 1 | 1 | 2 | 2 | 1 | 1 |

|     |   |   |   |   |   |   |   |   |
|-----|---|---|---|---|---|---|---|---|
| 181 | 2 | 1 | 1 | 1 | 2 | 2 | 2 | 2 |
| 182 | 2 | 1 | 1 | 1 | 1 | 2 | 1 | 2 |
| 183 | 2 | 1 | 1 | 1 | 2 | 2 | 1 | 1 |
| 184 | 2 | 1 | 1 | 1 | 2 | 2 | 2 | 2 |
| 185 | 2 | 1 | 1 | 1 | 2 | 2 | 2 | 2 |
| 186 | 2 | 1 | 1 | 1 | 2 | 2 | 1 | 2 |
| 187 | 2 | 1 | 1 | 1 | 2 | 2 | 1 | 1 |
| 190 | 2 | 1 | 1 | 1 | 2 | 2 | 2 | 2 |
| 191 | 2 | 2 | 2 | 1 | 2 | 2 | 1 | 1 |
| 192 | 2 | 2 | 2 | 1 | 2 | 2 | 1 | 2 |
| 193 | 2 | 2 | 2 | 1 | 2 | 2 | 1 | 2 |
| 194 | 2 | 2 | 2 | 1 | 2 | 2 | 1 | 1 |
| 195 | 2 | 2 | 2 | 1 | 2 | 2 | 2 | 2 |
| 196 | 2 | 2 | 2 | 1 | 2 | 2 | 2 | 2 |
| 197 | 2 | 2 | 2 | 1 | 2 | 2 | 1 | 2 |
| 198 | 2 | 2 | 2 | 1 | 2 | 2 | 2 | 1 |
| 199 | 2 | 2 | 2 | 1 | 2 | 2 | 1 | 2 |
| 200 | 2 | 2 | 2 | 1 | 2 | 2 | 2 | 2 |
| 201 | 2 | 2 | 2 | 1 | 2 | 2 | 1 | 2 |
| 202 | 2 | 2 | 2 | 1 | 2 | 2 | 1 | 2 |
| 203 | 2 | 2 | 2 | 1 | 2 | 2 | 1 | 2 |
| 204 | 2 | 2 | 2 | 1 | 2 | 2 | 1 | 2 |
| 205 | 2 | 2 | 2 | 1 | 2 | 2 | 1 | 1 |
| 206 | 2 | 2 | 2 | 1 | 2 | 2 | 2 | 2 |
| 207 | 2 | 2 | 2 | 1 | 2 | 2 | 1 | 2 |
| 208 | 2 | 2 | 2 | 1 | 2 | 2 | 2 | 1 |
| 209 | 2 | 2 |   | 1 | 2 | 2 | 1 | 2 |
| 210 | 2 | 2 | 2 | 1 | 2 | 2 | 1 | 2 |
| 211 | 2 | 2 | 2 | 1 | 2 | 2 | 1 | 2 |
| 212 | 2 | 2 | 2 | 1 | 2 | 2 | 1 | 1 |
| 213 | 2 | 2 |   | 1 | 2 | 1 | 2 | 2 |
| 214 | 2 | 2 | 2 | 1 | 2 | 2 | 1 | 2 |
| 215 | 2 | 2 | 2 | 1 | 2 | 2 | 2 | 2 |
| 216 | 2 | 2 | 2 | 1 | 2 | 2 | 1 | 2 |
| 217 | 2 | 2 | 2 | 1 | 2 | 2 | 2 | 2 |
| 218 | 2 | 2 | 2 | 1 | 1 | 2 | 1 | 2 |
| 219 | 2 | 2 | 2 | 2 | 2 | 2 | 2 | 1 |
| 220 | 2 | 2 | 1 | 1 | 2 | 2 | 1 | 2 |
| 221 | 2 | 2 | 2 | 1 | 2 | 1 | 2 | 2 |
| 222 | 2 | 2 | 2 | 1 | 2 | 2 | 2 | 1 |
| 223 | 2 | 2 | 2 | 1 | 2 | 2 | 1 | 2 |
| 224 | 2 | 2 | 2 | 1 | 2 | 2 | 2 | 2 |
| 225 | 2 | 2 | 2 | 1 | 2 | 2 | 2 | 2 |
| 226 | 2 | 2 | 2 | 1 | 2 | 2 | 1 | 2 |
| 227 | 2 | 2 | 2 | 1 | 2 | 2 | 2 | 2 |
| 228 | 2 | 2 | 2 | 1 | 2 | 2 | 2 | 2 |
| 229 | 2 | 2 | 2 | 1 | 2 | 2 | 2 | 2 |

|     |   |   |   |   |   |   |   |   |
|-----|---|---|---|---|---|---|---|---|
| 230 | 2 | 2 | 2 | 1 | 2 | 2 | 1 | 2 |
| 231 | 2 | 2 | 2 | 1 | 2 | 2 | 1 | 1 |
| 232 | 2 | 2 |   | 1 | 2 | 2 | 1 | 2 |
| 233 | 2 | 1 | 1 | 4 | 2 | 2 | 2 | 2 |
| 234 | 2 | 2 | 1 | 1 | 2 | 2 | 2 | 1 |
| 235 | 2 | 2 | 2 | 1 | 2 | 2 | 1 | 2 |
| 236 | 2 | 2 | 2 | 1 | 2 | 2 | 2 | 2 |
| 237 | 2 | 2 |   | 1 | 2 | 2 | 1 | 1 |
| 238 | 2 | 2 | 2 | 1 | 2 | 2 | 1 | 1 |
| 239 | 2 | 2 | 2 | 1 | 2 | 2 | 1 | 2 |
| 240 | 2 | 2 | 2 | 1 | 2 | 2 | 1 | 1 |
| 241 | 2 | 2 |   | 1 | 2 | 2 | 2 | 1 |
| 242 | 2 | 2 |   | 1 | 2 | 2 | 1 | 2 |
| 243 | 2 | 2 | 2 | 1 | 2 | 2 | 2 | 2 |
| 244 | 2 | 2 | 2 | 1 | 2 | 2 | 2 | 2 |
| 245 | 2 | 2 |   | 1 | 2 | 2 | 1 | 1 |
| 246 | 2 | 2 | 2 | 1 | 2 | 2 | 1 | 2 |
| 247 | 2 | 2 | 2 | 1 | 2 | 2 | 1 | 1 |
| 248 | 2 | 2 |   | 1 | 2 | 2 | 1 | 2 |
| 249 | 2 | 2 |   | 1 | 2 | 2 | 1 | 1 |
| 250 | 2 | 2 | 1 | 2 | 2 | 2 | 1 | 1 |
| 251 | 2 | 1 | 1 | 3 | 2 | 2 | 1 | 1 |
| 252 | 2 | 2 | 2 | 2 | 2 | 2 | 2 | 2 |
| 253 | 2 | 2 | 2 | 1 | 2 | 2 | 1 | 2 |
| 254 | 2 | 2 | 2 | 1 | 2 | 2 | 2 | 2 |
| 255 | 2 | 2 | 2 | 1 | 2 | 2 | 1 | 2 |
| 256 | 2 | 2 | 2 | 1 | 2 | 2 | 2 | 2 |
| 257 | 2 | 2 | 2 | 1 | 2 | 2 | 2 | 2 |
| 258 | 2 | 1 | 1 | 3 | 2 | 2 | 2 | 2 |
| 259 | 2 | 2 | 2 | 1 | 2 | 2 | 1 | 1 |
| 260 | 2 | 2 |   | 1 | 2 | 2 | 1 | 2 |
| 261 | 2 | 2 | 2 | 1 | 2 | 2 | 1 | 1 |
| 262 | 2 | 2 | 2 | 1 | 2 | 2 | 1 | 1 |
| 263 | 2 | 2 | 2 | 1 | 2 | 2 | 2 | 2 |
| 264 | 2 | 2 |   | 1 | 2 | 2 | 2 | 2 |
| 265 | 2 | 2 | 2 | 1 | 2 | 2 | 2 | 2 |
| 266 | 2 | 2 | 2 | 1 | 2 | 2 | 1 | 2 |
| 267 | 2 | 2 | 2 | 1 | 2 | 2 | 2 | 2 |
| 268 | 2 | 2 | 1 | 1 | 2 | 2 | 2 | 1 |
| 269 | 2 | 2 | 2 | 1 | 2 | 2 | 2 | 1 |
| 270 | 2 | 2 | 1 | 1 | 2 | 2 | 1 | 2 |
| 271 | 2 | 1 | 1 | 2 | 1 | 2 | 1 | 1 |
| 272 | 2 | 2 | 2 | 1 | 2 | 2 | 2 | 2 |
| 273 | 2 | 2 | 2 | 1 | 2 | 2 | 2 | 2 |
| 274 | 2 | 2 | 2 | 1 | 2 | 2 | 2 | 2 |
| 275 | 2 | 2 |   | 1 | 2 | 2 | 2 | 2 |
| 276 | 2 | 2 | 2 | 1 | 2 | 2 | 2 | 2 |

|     |   |   |   |   |   |   |   |   |
|-----|---|---|---|---|---|---|---|---|
| 277 | 2 | 2 | 2 | 1 | 2 | 2 | 2 | 2 |
| 278 | 2 | 2 | 2 | 1 | 2 | 2 | 2 | 2 |
| 279 | 2 | 2 | 2 | 1 | 2 | 2 | 2 | 1 |
| 280 | 2 | 2 | 2 | 1 | 2 | 2 | 1 | 2 |
| 281 | 2 | 2 | 2 | 1 | 2 | 2 | 2 | 2 |
| 282 | 2 | 2 | 2 | 1 | 2 | 2 | 2 | 2 |
| 283 | 2 | 2 | 2 | 1 | 2 | 2 | 1 | 2 |
| 284 | 2 | 2 | 2 | 1 | 2 | 2 | 2 | 2 |
| 285 | 2 | 2 | 2 | 1 | 2 | 2 | 2 | 2 |
| 286 | 2 | 2 | 2 | 1 | 2 | 2 | 1 | 1 |
| 287 | 2 | 2 | 2 | 1 | 2 | 2 | 2 | 2 |
| 288 | 2 | 2 | 2 | 1 | 2 | 2 | 2 | 2 |
| 289 | 2 | 2 | 2 | 1 | 2 | 2 | 2 | 2 |
| 290 | 2 | 2 | 2 | 1 | 2 | 2 | 1 | 2 |
| 291 | 2 | 2 | 2 | 1 | 2 | 2 | 2 | 2 |
| 292 | 2 | 2 | 2 | 1 | 2 | 2 | 2 | 2 |
| 293 | 2 | 2 | 2 | 1 | 2 | 2 | 2 | 2 |
| 294 | 2 | 2 | 2 | 1 | 2 | 2 | 2 | 2 |
| 295 | 2 | 2 | 2 | 1 | 2 | 2 | 2 | 2 |
| 296 | 2 | 2 | 2 | 1 | 2 | 2 | 2 | 2 |
| 297 | 2 | 2 | 2 | 1 | 2 | 2 | 2 | 1 |
| 298 | 2 | 2 | 2 | 1 | 2 | 2 | 2 | 2 |
| 299 | 2 | 1 | 1 | 2 | 1 | 2 | 1 | 1 |
| 300 | 2 | 2 | 1 | 1 |   | 2 | 2 | 2 |
| 301 | 2 | 2 | 1 | 1 | 2 | 2 | 2 | 2 |
| 302 | 2 | 1 | 1 | 1 | 2 | 2 | 1 | 1 |
| 303 | 2 | 2 | 2 | 2 | 2 | 2 | 2 | 2 |
| 304 | 2 | 2 | 1 | 1 | 2 | 2 | 1 | 2 |
| 305 | 2 | 2 | 1 | 2 | 2 | 2 | 2 | 2 |
| 306 | 2 | 1 | 1 | 2 | 1 | 2 | 1 | 1 |
| 307 | 2 | 2 |   | 1 | 1 | 1 | 1 | 1 |
| 308 | 2 | 1 | 1 | 4 | 2 | 2 | 2 | 2 |
| 309 | 2 | 1 | 1 | 4 | 1 | 1 | 1 | 1 |
| 310 | 2 | 2 | 1 | 1 | 2 | 2 | 2 | 2 |
| 311 | 2 | 1 | 1 | 2 | 2 | 2 | 1 | 2 |
| 312 | 2 | 1 | 1 | 2 | 1 | 2 | 2 | 2 |
| 313 | 2 | 1 | 1 | 3 | 1 | 2 | 1 | 1 |
| 314 | 2 | 1 | 1 | 3 | 1 | 2 | 1 | 1 |
| 315 | 2 | 2 | 1 | 1 | 2 | 2 | 2 | 2 |
| 316 | 2 | 2 | 1 | 1 | 1 | 2 | 2 | 1 |
| 317 | 2 |   | 2 | 2 | 1 | 2 | 2 | 2 |
| 318 | 2 | 1 | 2 | 2 | 1 | 2 | 1 | 1 |
| 319 | 2 | 2 | 1 | 1 | 2 | 2 | 2 | 2 |
| 320 | 2 | 2 | 1 | 2 | 1 | 2 | 2 | 1 |
| 321 | 2 | 1 | 1 | 2 | 1 | 2 | 1 | 1 |
| 322 | 2 | 1 | 1 | 1 | 1 | 1 | 1 | 1 |
| 323 | 2 | 1 | 1 | 1 | 1 | 2 | 1 | 1 |

|     |   |   |   |   |   |   |   |   |
|-----|---|---|---|---|---|---|---|---|
| 324 | 2 | 1 | 2 | 1 | 2 | 2 | 1 | 2 |
| 325 | 2 | 1 | 2 | 1 | 2 | 2 | 2 | 2 |
| 326 | 2 | 1 | 2 | 1 | 2 | 2 | 2 | 2 |
| 327 | 2 | 1 | 2 | 1 | 2 | 2 | 1 | 2 |
| 328 | 2 | 1 | 2 | 1 | 2 | 2 | 1 | 1 |
| 329 | 2 | 1 | 2 | 4 | 1 | 2 | 2 | 2 |
| 330 | 2 | 1 | 1 | 1 | 2 | 1 | 2 | 2 |
| 331 | 2 | 1 | 2 | 1 | 2 | 1 | 2 | 2 |
| 332 | 2 | 1 | 2 | 1 | 1 | 1 | 1 | 1 |
| 333 | 2 | 1 | 2 | 1 | 2 | 2 | 1 | 1 |
| 334 | 2 | 1 | 2 | 1 | 2 | 2 | 1 | 2 |
| 335 | 2 | 1 | 2 | 1 | 2 | 2 | 1 | 2 |
| 336 | 2 | 1 | 2 | 1 | 2 | 2 | 2 | 2 |
| 337 | 2 | 1 | 2 | 1 | 1 | 2 | 2 | 1 |
| 338 | 2 | 1 | 2 | 1 | 2 | 2 | 2 | 2 |
| 339 | 2 | 1 | 2 | 1 | 2 | 2 | 2 | 2 |
| 340 | 2 | 1 | 2 | 1 | 2 | 2 | 2 | 2 |
| 341 | 2 | 1 | 2 | 1 | 2 | 2 | 2 | 2 |
| 342 | 2 | 1 | 2 | 1 | 1 | 2 | 1 | 2 |
| 343 | 2 | 1 | 2 | 1 | 2 | 2 | 2 | 2 |
| 345 | 2 | 1 | 2 | 1 | 2 | 2 | 1 | 2 |
| 346 | 2 | 1 | 2 | 1 | 2 | 2 | 1 | 1 |
| 347 | 2 | 1 | 2 | 4 | 1 | 2 | 2 | 1 |
| 348 | 2 | 1 | 2 | 1 | 2 | 2 | 2 | 2 |
| 349 | 2 | 2 | 1 | 1 | 2 | 2 | 2 | 2 |
| 350 | 2 | 1 | 2 | 2 | 1 | 2 | 1 | 1 |
| 351 | 2 | 2 | 1 | 1 | 2 | 2 | 2 | 1 |
| 352 | 2 | 1 | 1 | 3 | 2 | 2 | 2 | 1 |
| 353 | 2 | 2 | 1 | 1 | 2 | 2 | 1 | 1 |
| 354 | 2 | 1 | 1 | 2 | 2 | 2 | 2 | 1 |
| 355 | 2 | 2 | 1 | 1 | 2 | 2 | 2 | 2 |
| 356 | 2 | 1 | 1 | 3 | 2 | 2 | 2 | 1 |
| 357 | 2 | 1 | 1 | 1 |   | 2 | 2 | 1 |
| 358 | 2 |   | 2 | 2 | 2 | 2 | 1 | 1 |
| 359 | 2 | 1 | 1 | 2 | 1 | 2 | 1 | 1 |
| 360 | 2 | 2 | 1 |   | 2 | 2 | 2 | 1 |
| 361 | 2 | 1 | 1 | 1 | 1 | 2 | 2 | 1 |
| 362 | 2 | 2 | 1 | 1 | 2 | 2 | 2 | 2 |
| 363 | 2 | 2 | 1 | 2 | 1 | 2 | 1 | 1 |
| 364 | 2 | 2 | 1 | 1 | 1 | 2 | 2 | 1 |
| 365 | 2 | 2 | 2 | 1 | 2 | 2 | 2 | 2 |
| 366 | 2 | 1 | 2 | 1 | 2 | 2 | 2 | 2 |
| 367 | 2 | 2 | 2 | 2 | 2 | 2 | 2 | 1 |
| 368 | 2 | 1 | 2 | 1 | 2 | 2 | 1 | 2 |
| 369 | 2 | 1 |   | 1 | 2 | 2 | 1 | 2 |
| 370 | 2 | 1 | 2 | 1 | 2 | 2 | 1 | 1 |
| 371 | 2 | 1 | 2 | 1 | 2 | 2 | 1 | 2 |

|     |   |   |   |   |   |   |   |   |
|-----|---|---|---|---|---|---|---|---|
| 372 | 2 | 1 | 2 | 2 | 1 | 1 | 1 | 2 |
| 373 | 2 | 1 | 2 | 1 | 2 | 2 | 2 | 2 |
| 374 | 2 | 1 | 2 | 1 | 2 | 2 | 1 | 2 |
| 375 | 2 | 1 | 1 | 1 | 2 | 2 | 2 | 1 |
| 376 | 2 | 2 | 2 | 1 | 2 | 2 | 2 | 1 |
| 377 | 2 | 2 | 1 | 1 | 2 | 2 | 2 | 2 |
| 378 | 2 | 2 | 1 | 1 | 2 | 2 | 2 | 2 |
| 379 | 2 | 2 | 1 | 1 | 2 | 2 | 1 | 2 |



| Q_2d | Q_2e | Q_3a | Q_3b | Q_3c | Q_3d           | Q_3d_spec | Q_4 | Q_5 |
|------|------|------|------|------|----------------|-----------|-----|-----|
| 2    | 1    | 1    | 2    | 2    | 2              |           | 2   | 2   |
| 1    | 2    | 1    | 2    | 2    | 2              |           | 2   | 2   |
| 2    | 2    | 1    | 2    | 2    | 2              |           | 2   | 2   |
| 2    | 2    | 1    | 2    | 1    | 2              |           | 2   | 2   |
| 2    | 2    | 1    | 2    | 2    | 2              |           | 2   | 2   |
| 2    | 2    | 1    | 1    | 1    | 2              |           | 1   | 1   |
| 2    | 2    | 1    | 2    | 2    | 2              |           | 2   | 2   |
| 2    | 2    | 2    | 1    | 2    | 2              |           | 1   | 2   |
| 2    | 1    | 2    | 2    | 2    | 1              |           | 1   | 2   |
| 2    | 2    | 1    | 2    | 2    | 2              |           | 1   | 2   |
| 1    | 2    | 1    | 2    | 2    | 2              |           | 2   | 2   |
| 2    | 2    | 1    | 1    | 1    | 2              |           | 1   | 2   |
| 2    | 2    | 1    | 2    | 1    | 2              |           | 2   | 2   |
| 2    | 1    | 1    | 2    | 1    | 2 time consu   |           | 2   |     |
| 2    | 2    | 1    | 2    | 2    | 2              |           | 2   | 2   |
| 2    | 2    | 1    | 2    | 2    | 2              |           | 2   | 2   |
| 1    | 2    | 1    | 2    | 2    | 1 more newe    |           | 2   | 2   |
| 1    | 2    | 1    | 1    | 2    | 2              |           | 1   | 1   |
| 2    | 1    | 1    | 2    | 1    | 2              |           | 2   | 1   |
| 2    | 1    | 1    | 2    | 1    | 2              |           | 2   | 1   |
| 2    | 1    | 1    | 2    | 1    | 2              |           | 2   | 1   |
| 1    | 2    | 1    | 2    | 1    | 2 cause crack  |           | 2   | 2   |
| 1    | 2    | 1    | 2    | 1    | 2 causes crac  |           | 2   | 2   |
| 1    | 2    | 1    | 1    | 1    | 2              |           | 2   | 2   |
| 1    | 2    | 1    | 1    | 1    | 2              |           | 2   | 2   |
| 2    | 1    | 2    | 2    | 2    | 1 retention, c |           | 2   | 1   |
| 2    | 1    | 2    | 2    | 2    | 1 retention, c |           | 2   | 1   |
| 2    | 2    | 1    | 2    | 1    | 2              |           | 2   | 2   |
| 2    | 2    | 1    | 2    | 1    | 2              |           | 2   | 2   |
| 2    | 1    | 1    | 1    | 1    | 2 also becaus  |           | 2   | 1   |
| 2    | 1    | 1    | 1    | 1    | 2 also becaus  |           | 2   | 1   |
| 2    | 2    | 1    | 2    | 1    | 2              |           | 2   | 2   |
| 2    | 2    | 1    | 2    | 1    | 2              |           | 2   | 2   |
| 1    | 2    | 1    | 2    | 2    | 2              |           | 2   | 2   |
| 2    | 1    | 1    | 2    | 2    | 2              |           | 2   | 2   |
| 2    | 2    | 2    | 2    | 1    | 2              |           | 2   | 2   |
| 2    | 2    | 1    | 2    | 1    | 2              |           | 2   | 2   |
| 2    | 2    | 1    | 2    | 1    | 2              |           | 2   | 2   |
| 2    | 1    | 1    | 1    | 1    | 1              |           | 1   | 1   |
| 2    | 2    | 1    | 2    | 1    | 2 a            |           | 2   | 2   |
| 2    | 1    | 1    | 1    | 1    | 2              |           | 1   | 1   |
| 1    | 2    | 1    | 2    | 1    | 2              |           | 2   | 2   |
| 1    | 2    | 1    | 2    | 1    | 2              |           | 2   | 2   |
| 1    | 2    | 1    | 2    | 1    | 2              |           | 2   | 2   |
| 2    | 2    | 2    | 1    | 1    | 2              |           | 1   | 2   |

|   |   |   |   |   |                 |   |   |
|---|---|---|---|---|-----------------|---|---|
| 2 | 2 | 1 | 2 | 1 | 2               | 2 | 2 |
| 1 | 2 | 1 | 2 | 1 | 2               | 2 | 2 |
| 2 | 1 | 2 | 2 | 2 | 2 not a resto   | 2 | 2 |
| 1 | 2 | 1 | 2 | 2 | 2               | 2 | 2 |
| 2 | 2 | 1 | 2 | 2 | 2               | 2 | 2 |
| 2 | 2 | 1 | 2 | 2 | 2               | 2 | 2 |
| 2 | 2 | 1 | 2 | 2 | 1 cavity conf   | 2 | 2 |
| 1 | 2 | 1 | 2 | 1 | 2               | 2 | 2 |
| 2 | 2 | 1 | 2 | 2 | 2               | 1 | 2 |
| 2 | 2 | 1 | 2 | 1 | 2               | 2 | 2 |
| 2 | 2 | 1 | 2 | 2 | 2               | 2 | 2 |
| 2 | 2 | 2 | 1 | 2 | 2               | 1 | 2 |
| 2 | 2 | 1 | 2 | 1 | 2               | 2 | 2 |
| 2 | 2 | 1 | 1 | 1 | 2 if there is 3 | 1 |   |
| 2 | 2 | 2 | 2 | 1 | 2               | 1 | 2 |
| 2 | 1 | 1 | 1 | 1 | 2               | 1 | 1 |
| 2 | 2 | 1 | 2 | 2 | 2               | 2 | 2 |
| 2 | 2 | 1 | 2 | 2 | 2               | 2 | 2 |
| 2 | 2 | 2 | 1 | 2 | 2               | 1 | 2 |
| 1 | 2 | 2 | 2 | 2 | 2               | 2 | 2 |
| 2 | 1 | 1 | 2 | 2 | 2               | 2 | 2 |
| 2 | 2 | 2 | 2 | 1 | 2               | 2 | 2 |
| 2 | 2 | 2 | 2 | 1 | 2               | 2 | 2 |
| 2 | 2 | 1 | 2 | 2 | 2               | 2 | 2 |
| 2 | 2 | 1 | 2 | 2 | 2               | 2 | 2 |
| 2 | 1 | 2 | 2 | 2 | 1               | 2 | 2 |
| 2 | 1 | 1 | 1 | 1 | 1               | 1 | 2 |
| 2 | 2 | 1 | 2 | 1 | 2               | 2 | 2 |
| 2 | 1 | 1 | 2 | 2 | 2               | 2 | 2 |
| 2 | 1 | 2 | 2 | 2 | 1 my specialt   | 2 | 2 |
| 2 | 2 | 1 | 1 | 1 | 2 condensati    | 2 | 2 |
| 2 | 1 | 1 | 2 | 1 | 2               | 2 | 2 |
| 2 | 2 | 1 | 2 | 1 | 2               | 2 | 2 |
| 2 | 2 | 1 | 1 | 2 | 2               | 2 | 2 |
| 2 | 2 | 1 | 1 | 2 | 2               | 2 | 2 |
| 2 | 2 | 1 | 2 | 1 | 2 depending     | 1 | 2 |
| 2 | 2 | 1 | 2 | 1 | 2               | 2 | 2 |
| 2 | 2 | 1 | 2 | 1 | 2               | 2 | 2 |
| 2 | 2 | 1 | 2 | 1 | 2 depending     | 1 | 2 |
| 2 | 1 | 1 | 2 | 2 | 2               | 2 | 1 |
| 2 | 2 | 2 | 2 | 1 | 2               | 2 | 2 |
| 1 | 2 | 1 | 2 | 1 | 2               | 2 | 1 |
| 1 | 2 | 1 | 2 | 1 | 2               | 2 | 2 |
| 2 | 1 | 2 | 2 | 2 | 1 preserve tc   | 2 | 1 |
| 2 | 1 | 2 | 2 | 1 | 2               | 2 | 2 |
| 1 | 2 | 1 | 2 | 1 | 2               | 2 | 2 |
| 1 | 2 | 1 | 1 | 2 | 2               | 1 | 2 |

|   |   |   |   |   |                |   |   |
|---|---|---|---|---|----------------|---|---|
| 2 | 2 | 2 | 2 | 1 | 2              | 2 | 2 |
| 2 | 2 | 1 | 2 | 1 | 2 cavity suite | 2 | 2 |
| 1 | 2 | 1 | 2 | 2 | 2              | 2 | 2 |
| 1 | 2 | 1 | 2 | 1 | 2              | 2 | 2 |
| 2 | 2 | 1 | 2 | 2 | 2              | 2 | 2 |
| 2 | 2 | 1 | 2 | 2 | 2              | 2 | 2 |
| 2 | 1 | 1 | 2 | 2 | 2              | 2 | 1 |
| 2 | 1 | 1 | 2 | 2 | 2              | 1 | 2 |
| 1 | 2 | 1 | 2 | 1 | 2              | 2 | 2 |
| 2 | 2 | 1 | 2 | 1 | 2              | 2 | 2 |
| 2 | 2 | 2 | 2 | 1 | 2              | 2 | 2 |
| 2 | 1 | 1 | 2 | 2 | 2              | 2 | 2 |
| 2 | 1 | 1 | 2 | 2 | 2              | 2 | 2 |
| 1 | 2 | 1 | 2 | 1 | 2              | 2 | 2 |
| 1 | 2 | 2 | 2 | 1 | 2              | 2 | 2 |
| 2 | 1 | 2 | 1 | 2 | 2              | 1 | 1 |
| 2 | 1 | 2 | 2 | 1 | 2              | 2 | 1 |
| 2 | 1 | 2 | 2 | 2 | 1 im not rest  | 2 | 2 |
| 2 | 1 | 1 | 2 | 1 | 2              | 2 | 1 |
| 2 | 2 | 1 | 2 | 2 | 2              | 2 | 2 |
| 2 | 1 | 1 | 2 | 2 | 2              | 2 | 2 |
| 1 | 2 | 1 | 2 | 1 | 2              | 2 | 2 |
| 2 | 1 | 2 | 2 | 1 | 2              | 1 | 1 |
| 2 | 2 | 1 | 2 | 2 | 2              | 2 | 2 |
| 2 | 2 | 1 | 2 | 2 | 2              | 1 | 2 |
| 2 | 2 | 1 | 2 | 1 | 2              | 2 | 2 |
| 2 | 1 | 1 | 2 | 1 | 2              | 2 | 2 |
| 2 | 2 | 1 | 1 | 1 | 2              | 1 | 2 |
| 2 | 2 | 1 | 2 | 1 | 2              | 2 | 2 |
| 2 | 2 | 2 | 2 | 1 | 2              | 2 | 2 |
| 2 | 2 | 1 | 1 | 2 | 2              | 2 | 2 |
| 2 | 1 | 1 | 2 | 2 | 2              | 2 | 2 |
| 2 | 2 | 1 | 2 | 2 | 2              | 1 | 1 |
| 2 | 2 | 1 | 2 | 2 | 2              | 2 | 2 |
| 2 | 1 | 1 | 2 | 1 | 2              | 2 | 2 |
| 2 | 2 | 1 | 2 | 2 | 2              | 1 | 2 |
| 1 | 2 | 1 | 2 | 1 | 2              | 2 | 2 |
| 2 | 1 | 1 | 2 | 1 | 2              | 2 | 2 |
| 2 | 2 | 1 | 1 | 1 | 2              | 1 | 1 |
| 2 | 2 | 2 | 2 | 1 | 2              | 2 | 2 |
| 1 | 2 | 1 | 2 | 1 | 2              | 2 | 2 |
| 2 | 2 | 1 | 2 | 2 | 1 small caviti | 2 | 2 |
| 1 | 2 | 1 | 2 | 1 | 2              | 2 | 2 |
| 1 | 2 | 1 | 2 | 2 | 2              | 2 | 2 |
| 2 | 2 | 2 | 2 | 1 | 2 honestly i p | 2 | 2 |
| 2 | 2 | 1 | 1 | 1 | 2              | 1 | 2 |

|   |   |   |   |   |               |   |   |
|---|---|---|---|---|---------------|---|---|
| 2 | 1 | 2 | 2 | 2 | 1 need time   | 2 | 2 |
| 2 | 2 | 1 | 2 | 1 | 2             | 2 | 2 |
| 1 | 2 | 1 | 2 | 1 | 1 bonding     | 2 | 2 |
| 1 | 2 | 1 | 2 | 1 | 2             | 2 | 2 |
| 1 | 2 | 1 | 2 | 1 | 2             | 2 | 2 |
| 2 | 2 | 1 | 2 | 2 | 2             | 2 | 1 |
| 1 | 2 | 1 | 1 | 2 | 2             | 1 | 2 |
| 2 | 1 | 1 | 1 | 2 | 2             | 1 | 2 |
| 2 | 2 | 1 | 2 | 1 | 2             | 2 | 2 |
| 2 | 2 | 2 | 1 | 2 | 2             | 1 | 2 |
| 2 | 2 | 2 | 1 | 2 | 2             | 1 | 2 |
| 1 | 2 | 2 | 1 | 1 | 2             | 1 | 2 |
| 2 | 1 | 2 | 1 | 2 | 2             | 1 | 2 |
| 2 | 1 | 2 | 1 | 2 | 2             | 1 | 2 |
| 2 | 2 | 1 | 1 | 1 | 2             | 1 | 1 |
| 2 | 2 | 2 | 2 | 1 | 2             | 1 | 2 |
| 2 | 1 | 1 | 1 | 2 | 2             | 1 | 1 |
| 2 | 2 | 1 | 2 | 2 | 2             | 2 | 2 |
| 2 | 2 | 1 | 2 | 2 | 2             | 2 | 2 |
| 2 | 2 | 1 | 2 | 2 | 2             | 2 | 2 |
| 1 | 2 | 1 | 2 | 2 | 2             | 1 | 2 |
| 1 | 2 | 1 | 1 | 2 | 2             | 1 | 2 |
| 1 | 2 | 1 | 2 | 2 | 2             | 2 | 1 |
| 2 | 2 | 2 | 2 | 1 | 2             | 2 | 2 |
| 2 | 2 | 2 | 2 | 1 | 2             | 1 | 1 |
| 2 | 2 | 1 | 2 | 2 | 2             | 1 | 1 |
| 2 | 2 | 1 | 2 | 2 | 2             | 2 | 2 |
| 2 | 2 | 1 | 2 | 2 | 2             | 2 | 2 |
| 2 | 2 | 1 | 1 | 1 | 2             | 1 | 2 |
| 2 | 2 | 1 | 2 | 2 | 2             | 2 | 2 |
| 2 | 2 | 1 | 2 | 1 | 2             | 2 | 2 |
| 2 | 1 | 1 | 2 | 1 | 1 thermal co  | 2 | 1 |
| 2 | 2 | 1 | 2 | 1 | 2             | 2 | 2 |
| 2 | 1 | 1 | 2 | 1 | 1 sensitivity | 1 | 1 |
| 2 | 2 | 1 | 2 | 2 | 2             | 1 | 1 |
| 2 | 2 | 1 | 2 | 1 | 2             | 2 | 2 |
| 2 | 2 | 2 | 1 | 2 | 2             | 1 | 2 |
| 2 | 2 | 1 | 1 | 1 | 2             | 1 | 2 |
| 1 | 2 | 1 | 1 | 1 | 2             | 1 | 2 |
| 2 | 2 | 1 | 1 | 1 | 2             | 1 | 2 |
| 1 | 2 | 1 | 1 | 1 | 2             | 1 | 2 |
| 2 | 1 | 2 | 1 | 1 | 2             | 1 | 1 |
| 2 | 2 | 1 | 1 | 2 | 2             | 2 | 2 |
| 2 | 1 | 1 | 1 | 2 | 2             | 1 | 2 |
| 2 | 1 | 2 | 1 | 1 | 2             | 1 | 1 |
| 2 | 1 | 1 | 2 | 1 | 2             | 1 | 1 |

|   |   |   |   |   |             |   |   |
|---|---|---|---|---|-------------|---|---|
| 2 | 2 | 2 | 1 | 1 | 2           | 1 | 1 |
| 2 | 2 | 1 | 1 | 2 | 2           | 1 | 2 |
| 2 | 2 | 1 | 2 | 2 | 2           | 2 | 2 |
| 1 | 2 | 2 | 2 | 1 | 2           | 2 | 2 |
| 1 | 2 | 1 | 1 | 1 | 2           | 1 | 2 |
| 2 | 2 | 1 | 2 | 2 | 2           | 1 | 1 |
| 2 | 1 | 1 | 2 | 1 | 2           | 1 | 2 |
| 2 | 2 | 1 | 2 | 2 | 2           | 2 | 2 |
| 1 | 2 | 1 | 2 | 2 | 2           | 2 | 2 |
| 2 | 2 | 1 | 2 | 2 | 2           | 2 | 2 |
| 2 | 2 | 2 | 1 | 2 | 2           | 1 | 1 |
| 2 | 2 | 2 | 2 | 1 | 2           | 1 | 2 |
| 1 | 2 | 1 | 2 | 1 | 2           | 2 | 2 |
| 2 | 1 | 1 | 2 | 2 | 2           | 1 | 1 |
| 2 | 2 | 2 | 1 | 2 | 1 time      | 1 | 2 |
| 2 | 2 | 2 | 2 | 1 | 2           | 2 | 2 |
| 1 | 2 | 1 | 2 | 1 | 2           | 1 | 2 |
| 2 | 2 | 1 | 2 | 1 | 2           | 2 | 2 |
| 2 | 2 | 1 | 2 | 1 | 2           | 2 | 2 |
| 1 | 2 | 1 | 2 | 2 | 2           | 2 | 2 |
| 1 | 2 | 1 | 1 | 1 | 2           | 1 | 2 |
| 1 | 1 | 1 | 1 | 1 | 2           | 1 | 1 |
| 2 | 2 | 1 | 2 | 2 | 2           | 2 | 2 |
| 2 | 1 | 2 | 2 | 2 | 1 i hate it | 1 | 2 |
| 2 | 2 | 1 | 2 | 2 | 2           | 2 | 2 |
| 2 | 1 | 1 | 2 | 1 | 2           | 1 | 1 |
| 2 | 1 | 1 | 2 | 1 | 2           | 1 | 1 |
| 2 | 1 | 1 | 2 | 1 | 1           | 2 | 2 |
| 2 | 2 | 1 | 2 | 1 | 2           | 1 | 1 |
| 2 | 2 | 1 | 2 | 2 | 2           | 1 | 2 |
| 1 | 2 | 1 | 1 | 2 | 2           | 1 | 2 |
| 1 | 2 | 1 | 1 | 2 | 2           | 1 | 2 |
| 2 | 1 | 1 | 1 | 1 | 2           | 1 | 2 |
| 2 | 1 | 1 | 2 | 2 | 2           | 1 | 1 |
| 2 | 1 | 1 | 2 | 1 | 2           | 2 | 1 |
| 2 | 2 | 1 | 2 | 2 | 2           | 1 | 2 |
| 2 | 1 | 1 | 2 | 1 | 2           | 1 | 2 |
| 2 | 2 | 1 | 2 | 1 | 2           | 1 | 2 |
| 1 | 2 | 1 | 2 | 1 | 2           | 2 | 2 |
| 2 | 2 | 1 | 1 | 1 | 2           | 1 | 1 |
| 2 | 2 | 2 | 2 | 1 | 2           | 2 | 2 |
| 2 | 1 | 1 | 2 | 1 | 2           | 2 | 1 |
| 2 | 1 | 1 | 2 | 1 | 2           | 2 | 1 |
| 2 | 1 | 2 | 2 | 1 | 2           | 2 | 1 |
| 2 | 1 | 1 | 2 | 2 | 2           | 2 | 1 |

|   |   |   |   |   |   |   |   |
|---|---|---|---|---|---|---|---|
| 2 | 1 | 1 | 2 | 1 | 2 | 2 | 1 |
| 2 | 1 | 1 | 2 | 1 | 1 | 2 | 1 |
| 2 | 1 | 1 | 2 | 1 | 2 | 2 | 1 |
| 2 | 1 | 1 | 2 | 2 | 2 | 2 | 1 |
| 2 | 1 | 1 | 2 | 2 | 2 | 2 | 1 |
| 2 | 1 | 1 | 1 | 1 | 2 | 1 | 1 |
| 2 | 1 | 2 | 2 | 1 | 2 | 1 | 1 |
| 2 | 1 | 1 | 1 | 1 | 2 | 1 | 1 |
| 2 | 1 | 1 | 2 | 2 | 2 | 1 | 1 |
| 2 | 2 | 1 | 2 | 2 | 2 | 2 | 1 |
| 2 | 1 | 2 | 2 | 1 | 2 | 2 | 1 |
| 2 | 1 | 1 | 1 | 1 | 2 | 1 | 1 |
| 2 | 1 | 1 | 2 | 2 | 2 | 2 | 1 |
| 2 | 1 | 1 | 1 | 1 | 2 | 1 | 2 |
| 2 | 1 | 2 | 2 | 2 | 1 | 2 | 1 |
| 2 | 1 | 1 | 1 | 1 | 2 | 1 | 2 |
| 2 | 1 | 1 | 2 | 2 | 2 | 2 | 2 |
| 2 | 1 | 1 | 1 | 1 | 2 | 1 | 2 |
| 2 | 1 | 1 | 2 | 2 | 2 | 2 | 2 |
| 2 | 2 | 1 | 1 | 1 | 2 | 1 | 2 |
| 1 | 2 | 1 | 1 | 1 | 2 | 2 | 2 |
| 2 | 1 | 1 | 2 | 2 | 2 | 2 | 2 |
| 2 | 2 | 2 | 2 | 1 | 2 | 1 | 1 |
| 2 | 1 | 1 | 1 | 1 | 2 | 2 | 1 |
| 1 | 2 | 1 | 1 | 1 | 2 | 1 | 2 |
| 1 | 2 | 2 | 2 | 1 | 2 | 2 | 2 |
| 2 | 1 | 1 | 1 | 1 | 2 | 2 | 2 |
| 1 | 2 | 1 | 2 | 1 | 2 | 2 | 2 |
| 1 | 2 | 2 | 2 | 2 | 2 | 2 | 2 |
| 1 | 2 | 1 | 2 | 2 | 2 | 2 | 2 |
| 1 | 2 | 2 | 2 | 1 | 2 | 2 | 2 |
| 1 | 2 | 1 | 1 | 1 | 2 | 1 | 2 |
| 1 | 2 | 2 | 2 | 1 | 2 | 2 | 2 |
| 1 | 2 | 2 | 2 | 1 | 2 | 2 | 2 |
| 1 | 2 | 2 | 2 | 1 | 2 | 1 | 2 |
| 1 | 2 | 2 | 2 | 1 | 2 | 2 | 2 |
| 1 | 2 | 2 | 2 | 1 | 2 | 1 | 2 |
| 2 | 2 | 1 | 1 | 1 | 2 | 2 | 2 |

|   |   |   |   |   |              |   |   |
|---|---|---|---|---|--------------|---|---|
| 2 | 2 | 2 | 1 | 2 | 2            | 1 | 2 |
| 2 | 1 | 1 | 2 | 2 | 2            | 1 | 2 |
| 2 | 1 | 2 | 2 | 1 | 2            | 2 | 1 |
| 1 | 2 | 2 | 2 | 2 | 1 bad materi | 1 | 2 |
| 2 | 2 | 2 | 1 | 1 | 2            | 2 | 2 |
| 1 | 2 | 1 | 2 | 2 | 2            | 2 | 1 |
| 2 | 2 | 1 | 2 | 1 | 2            | 1 | 1 |
| 2 | 2 | 2 | 2 | 1 | 2            | 2 | 2 |
| 2 | 2 | 1 | 2 | 1 | 1 economic s | 2 | 2 |
| 2 | 2 | 2 | 1 | 1 | 2            | 2 | 2 |
| 2 | 2 | 1 | 2 | 1 | 2            | 2 | 2 |
| 2 | 2 | 1 | 2 | 1 | 2            | 1 | 2 |
| 2 | 1 | 1 | 2 | 2 | 2            | 1 | 1 |
| 2 | 2 | 2 | 2 | 2 | 2            | 1 | 2 |
| 2 | 1 | 1 | 1 | 2 | 2            | 2 | 2 |
| 1 | 2 | 1 | 1 | 1 | 2            | 1 | 1 |
| 2 | 1 | 1 | 1 | 1 | 2            | 2 | 1 |
| 2 | 1 | 2 | 2 | 1 | 2            | 1 | 1 |
| 2 | 2 | 2 | 2 | 2 | 1 none       | 1 | 2 |
| 2 | 1 | 1 | 2 | 2 | 2            | 2 | 2 |
| 2 | 2 | 1 | 2 | 2 | 2            | 1 | 2 |
| 1 | 2 | 1 | 2 | 1 | 2            | 2 | 2 |
| 2 | 2 | 1 | 2 | 2 | 2            | 2 | 2 |
| 2 | 2 | 1 | 2 | 2 | 2            | 2 | 2 |
| 1 | 2 | 1 | 2 | 2 | 2            | 2 | 2 |
| 2 | 2 | 1 | 1 | 1 | 2            | 1 | 2 |
| 1 | 2 | 1 | 1 | 1 | 2            | 2 | 2 |
| 1 | 2 | 2 | 2 | 1 | 2            | 1 | 1 |
| 1 | 2 | 1 | 1 | 1 | 2            | 2 | 1 |
| 1 | 2 | 2 | 2 | 1 | 2            | 2 | 2 |
| 1 | 2 | 1 | 2 | 1 | 2            | 1 | 1 |
| 2 | 2 | 2 | 2 | 1 | 2            | 1 | 2 |
| 2 | 1 | 1 | 1 | 1 | 2            | 1 | 2 |
| 2 | 2 | 1 | 2 | 1 | 2            | 2 | 2 |
| 1 | 2 | 1 | 1 | 1 | 2            | 2 | 2 |
| 2 | 1 | 1 | 2 | 2 | 2            | 1 | 1 |
| 2 | 1 | 2 | 2 | 2 | 1            | 2 | 1 |
| 2 | 2 | 2 | 2 | 1 | 2            | 1 | 1 |
| 2 | 2 | 1 | 2 | 2 | 2            | 2 | 2 |
| 2 | 2 | 1 | 2 | 2 | 2            | 2 | 2 |
| 2 | 2 | 1 | 2 | 2 | 2            | 1 | 2 |
| 2 | 2 | 1 | 2 | 1 | 2            | 1 | 2 |

|   |   |   |   |   |                |   |   |
|---|---|---|---|---|----------------|---|---|
| 2 | 2 | 1 | 2 | 2 | 2              |   |   |
| 2 | 1 | 1 | 2 | 2 | 2              | 1 | 2 |
| 1 | 2 | 1 | 2 | 2 | 1 difficult ma | 2 | 2 |
| 1 | 2 | 1 | 1 | 1 | 2              | 1 | 2 |
| 1 | 2 | 1 | 1 | 2 | 2              | 1 | 2 |
| 1 | 2 | 1 | 2 | 2 | 2              | 1 | 1 |
| 1 | 2 | 1 | 2 | 2 | 2              | 1 | 1 |
| 2 | 2 | 1 | 2 | 2 | 2              | 1 | 1 |



| Q_6 | Q_7 | Comments      | Job_czat |
|-----|-----|---------------|----------|
| 1   | 2   | some clinic   | 1        |
| 2   | 2   | isolation     | 1        |
|     | 2   | can't be rej  | 2        |
| 1   | 2   | Arabic        | 2        |
| 1   | 2   |               | 1        |
| 1   | 1   | arabic        | 1        |
| 2   | 2   | arabic        | 1        |
| 1   | 2   |               | 1        |
| 2   | 2   | arabic        | 2        |
| 1   | 1   | toxicity of r | 2        |
| 2   | 2   |               | 2        |
| 1   | 2   | arabic        | 1        |
| 2   | 2   | arabic        | 1        |
| 1   | 2   | advantages    | 1        |
| 1   | 2   | arabic        | 1        |
|     | 2   | amalgam h     | 1        |
|     | 2   | arabic        | 1        |
| 1   | 1   | amalgam t:    | 1        |
| 1   | 1   | arabic        | 1        |
| 1   | 1   |               | 1        |
| 1   | 1   |               | 1        |
| 1   | 2   | no scientifi  | 2        |
| 1   | 2   | no scientifi  | 2        |
| 1   | 1   | arabic        | 2        |
| 1   | 1   | arabic        | 2        |
| 1   | 2   | no justifiab  | 1        |
| 1   | 2   | no justifiab  | 1        |
| 1   | 2   |               | 2        |
| 1   | 2   |               | 2        |
|     | 2   | arabic        | 2        |
|     | 2   | arabic        | 2        |
| 1   | 2   | arabic        | 2        |
| 1   | 2   | arabic        | 2        |
| 1   | 2   | arabic        | 2        |
| 1   | 2   | arabic        | 2        |
| 1   | 2   | arabic        | 2        |
| 1   | 2   | arabic        | 1        |
| 3   | 2   | bad oral hy   | 1        |
| 1   | 2   | arabic        | 1        |
| 1   | 1   | a             | 1        |
| 1   | 2   | a             | 1        |
| 1   | 1   | a             | 2        |
| 1   | 2   | a             | 2        |
| 1   | 2   | a             | 2        |
|     | 2   | safe materi   | 2        |
|     | 2   | safe materi   | 2        |
| 1   | 2   | a             | 1        |

|   |                |   |
|---|----------------|---|
| 2 | 2 a            | 1 |
| 1 | 2 good longe   | 1 |
| 1 | 2 safe         | 2 |
| 1 | 2 a            | 2 |
| 1 | 2 a            | 2 |
| 2 | 2              | 2 |
| 1 | 2 there are c  | 1 |
| 1 | 2 a            | 1 |
| 1 | 2 a            | 1 |
| 1 | 2 not all case | 1 |
| 1 | 1 a            | 1 |
| 1 | 1 a            | 1 |
| 2 | 1 a            | 1 |
| 3 | 2 a            | 2 |
| 1 | 2 a            | 1 |
| 1 | 1 a            | 2 |
| 2 | 2 the absenc   | 1 |
| 2 | 2 the absenc   | 1 |
| 2 | 2 a            | 2 |
|   | 2 a            | 2 |
| 1 | 2              | 1 |
| 1 |                | 1 |
| 1 | 2 composite    | 2 |
| 2 | 2 a            | 1 |
| 1 | 2 because sti  | 2 |
| 2 | 2 a            | 1 |
| 1 | 2 a            | 1 |
| 1 | 2 a            | 1 |
| 2 | 2 a            | 1 |
| 1 | 2 a            | 2 |
|   | 1 patient des  | 2 |
| 1 | 1 a            | 1 |
|   | 2              | 1 |
| 1 | 2 very large c | 1 |
| 1 | 2 very large c | 1 |
| 1 | 2 a            | 1 |
| 2 | 2 a            | 2 |
| 2 | 2 a            | 2 |
| 1 | 2 a            | 1 |
| 1 | 1 a            | 1 |
| 2 | 2              | 1 |
| 2 | 2 a            | 1 |
| 2 | 2 a            | 1 |
| 1 | 1 a            | 1 |
| 1 | 1 a            | 1 |
| 1 | 2 a            | 1 |
| 3 | 2 because it l | 2 |

|   |                |   |
|---|----------------|---|
| 1 | 2 a            | 1 |
| 2 | 2 no approve   | 1 |
| 1 | 2 uncontrolo   | 1 |
| 1 | 2 because its  | 1 |
| 1 | 2 toxicity not | 2 |
|   | 2 i am period  | 2 |
| 1 | 1              | 1 |
| 1 | 2 depends or   | 2 |
| 3 | 2 a            | 2 |
| 1 | 2 a            | 2 |
| 1 | 2              | 1 |
| 1 | 1 a            | 1 |
| 1 | 1 a            | 2 |
| 2 | 2              | 1 |
| 2 | 2 a            | 1 |
| 1 | 1              | 1 |
| 1 | 2              | 2 |
| 1 | 2 a            | 1 |
| 1 | 1              | 1 |
| 2 | 2 because nc   | 1 |
| 1 | 2              | 1 |
| 1 | 2 we need it   | 1 |
| 1 | 1 a            | 1 |
| 1 | 2              | 2 |
| 1 | 2 a            | 1 |
| 2 | 2              | 2 |
| 1 | 2              | 1 |
| 1 | 2              | 1 |
| 1 | 2 amalgam g    | 2 |
|   | 2 a            | 1 |
| 2 | 2              | 1 |
| 1 | 2 a            | 1 |
| 1 | 2 a            | 1 |
| 1 | 1 because co   | 1 |
| 2 | 1 a            | 1 |
| 1 | 2 high succes  | 1 |
| 2 | 2 a            | 1 |
| 1 | 2 a            | 1 |
| 1 | 1              | 1 |
| 1 | 1 mercury to   | 1 |
| 1 | 2 it has great | 1 |
| 1 | 2 a            | 1 |
| 2 | 2 a            | 1 |
| 1 | 2 a            | 1 |
| 1 | 2 a            | 1 |
| 1 | 2 amalgam is   | 1 |
| 1 | 2              | 1 |

|   |                |   |
|---|----------------|---|
| 2 | 2 more longe   | 1 |
| 2 | 2 best in long | 1 |
| 1 | 2 a            | 1 |
| 1 | 2 a            | 1 |
| 1 | 2              | 1 |
| 1 | 1 esthetic     | 1 |
| 1 | 1              | 1 |
| 1 | 1 a            | 1 |
| 1 | 2 a            | 1 |
| 2 | 2 because of   | 1 |
| 2 | 2 because lar  | 1 |
| 1 | 2 amalgam n    | 1 |
| 1 | 1 a            | 1 |
| 1 | 1 a            | 1 |
| 1 | 1 esthetics    | 1 |
| 1 | 1 not estheti  | 1 |
| 1 | 1              | 1 |
| 1 | 1              | 1 |
| 1 | 2 a            | 1 |
| 1 | 2 a            | 1 |
| 1 | 2 a            | 1 |
| 1 | 1              | 1 |
| 1 | 1              | 1 |
| 1 | 2 a            | 1 |
| 1 | 2 a            | 1 |
| 1 | 1 a            | 1 |
| 1 | 1              | 1 |
| 1 | 2              | 1 |
| 1 | 1 a            | 1 |
| 2 | 2              | 1 |
| 2 | 2 their streng | 1 |
| 1 | 2              | 1 |
| 1 | 1              | 1 |
| 2 | 2 a            | 1 |
| 1 | 1              | 1 |
| 1 | 2 because its  | 1 |
| 1 | 1              | 1 |
| 1 | 2 a            | 1 |
| 1 | 1 a            | 1 |
| 1 | 2 a            | 1 |
| 1 | 2              | 1 |
| 2 | 1 a            | 1 |
| 1 | 2 a            | 1 |
| 1 | 2              | 1 |
| 1 | 1              | 1 |
| 1 | 1 esthetics ai | 1 |
| 1 | 1              | 1 |



|   |               |   |
|---|---------------|---|
| 1 | 1             | 1 |
| 1 | 1             | 1 |
| 1 | 1             | 1 |
| 1 | 1             | 1 |
| 1 | 1 a           | 1 |
| 2 | 1             | 1 |
| 1 | 1             | 1 |
| 1 | 1 a           | 1 |
| 1 | 1             | 1 |
| 1 | 1             | 1 |
| 1 | 1             | 1 |
| 1 | 1             | 1 |
| 1 | 1             | 1 |
| 1 | 1             | 1 |
| 1 | 1             | 1 |
| 1 | 1             | 1 |
| 1 | 1             | 1 |
| 1 | 1             | 1 |
| 1 | 1             | 1 |
| 1 | 1             | 1 |
| 1 | 2 a           | 1 |
| 1 | 1             | 1 |
| 1 | 1             | 1 |
| 1 | 1             | 1 |
| 1 | 1             | 1 |
| 1 | 1             | 1 |
| 1 | 1             | 1 |
| 1 | 1             | 1 |
| 1 | 1             | 1 |
| 1 | 2             | 1 |
| 1 | 1             | 1 |
| 1 | 2 a           | 1 |
| 1 | 1             | 1 |
| 1 | 1             | 1 |
| 1 | 2             | 1 |
| 1 | 1 composite   | 2 |
| 2 | 2 durable am  | 2 |
| 1 | 1 nobody like | 1 |
| 1 | 1 new compc   | 1 |
| 1 | 1             | 1 |
| 1 | 2             | 2 |
| 1 | 1 composite   | 2 |
| 1 | 1 amalgam is  | 1 |
| 2 | 2             | 1 |
| 1 | 1             | 1 |
| 2 | 2             | 1 |
| 1 | 1             | 1 |
| 1 | 1             | 1 |
| 2 | 2             | 1 |
| 2 | 2             | 1 |
| 3 | 2             | 1 |

|   |                |   |
|---|----------------|---|
| 1 | 2 a            | 1 |
| 1 | 2 a            | 1 |
| 1 | 2 a            | 1 |
| 1 | 2 a            | 1 |
| 1 | 2 large restor | 1 |
| 1 | 2              | 2 |
| 1 | 1 esthetic     | 1 |
| 1 | 2              | 1 |
| 1 | 1 a            | 1 |
| 1 | 2 a            | 1 |
| 1 | 2 isolation    | 1 |
| 1 | 1 a            | 1 |
| 1 | 1 not estheti  | 1 |
| 1 | 1              | 1 |
| 1 | 1              | 1 |
| 1 | 2 a            | 1 |
| 1 | 2 a            | 1 |
| 1 | 1 a            | 1 |
| 2 | 2 a            | 1 |
| 1 | 2 a            | 1 |
| 1 | 2              | 1 |
| 2 | 2              | 1 |
| 1 | 2 a            | 2 |
| 1 | 2 a            | 1 |
| 1 | 1              | 1 |
| 2 | 2              | 1 |
| 1 | 1              | 1 |
| 1 | 2              | 2 |
| 1 | 1              | 1 |
| 1 | 2              | 1 |
| 1 | 2              | 1 |
| 1 | 1              | 2 |
| 1 | 1              | 1 |
| 1 | 1              | 1 |
| 2 | 2              | 1 |
| 1 | 2              |   |
| 1 | 2              | 1 |
| 1 | 1              | 1 |
| 1 | 1              | 1 |
| 1 | 2              | 1 |
| 1 | 1              | 1 |
| 1 | 1              | 1 |
| 1 | 2 a            | 1 |
| 1 | 2              | 1 |
| 1 | 2              | 1 |
| 1 | 2 a            | 1 |
| 1 | 2 a            | 1 |

|   |     |   |
|---|-----|---|
| 1 | 2 a | 1 |
| 1 | 2 a | 1 |
| 1 | 1   | 1 |
| 1 | 1   | 1 |
| 1 | 1   | 1 |
| 1 | 1   | 1 |
| 1 | 1 a | 1 |
